# Supplementary material
Source: PubMed Central journal article supplement (PMC4068518)

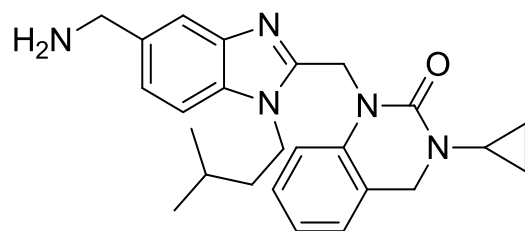

Fig. S1. Structure of RSV fusion inhibitor AZD4316.

Supplement: AAC.02540-14_zac007143010so1.pdf [file AAC.02540-14_zac007143010so1.pdf]
